# Supplementary material for: Air pollution reductions caused by the COVID-19 lockdown open up a way to preserve the Himalayan glaciers
Source: Copernicus journal article supplement (doi:10.5194/acp-23-10439-2023), 2023-09-21
Supplement: Supplementary file 1 [file acp-23-10439-2023-supplement.pdf]

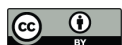

*Supplement of*

## **Air pollution reductions caused by the COVID-19 lockdown open up a way to preserve the Himalayan glaciers**

**Suvarna Fadnavis et al.**

*Correspondence to:* Suvarna Fadnavis (suvarna@tropmet.res.in)

The copyright of individual parts of the supplement might differ from the article licence.

1

## 2 Supplementary Figures

3

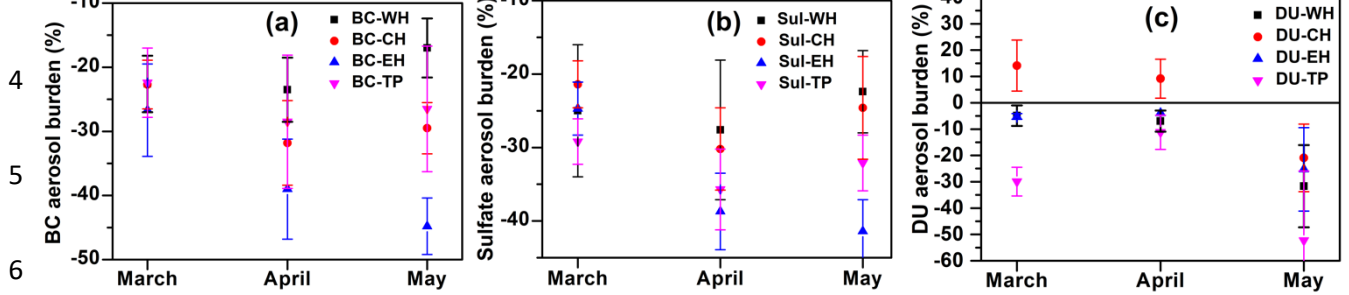

7

8 **Figure S1:** (a) Anomalies (COVID-CTL) of simulated BC burden (%) for March - May 2020  
9 over the Western Himalayas (WH), Central Himalayas (CH), Eastern Himalayas (EH), and  
10 Tibetan Plateau (TP), (b) same as (a) but for sulfate burden (%) from ECHAM6-HAMMOZ,  
11 (c) same as (a) but for dust burden (%) from ECHAM6-HAMMOZ.

12

13

14

15

16

17

18

19

20

21

22

23

24

25

26

27

28

29

30

31

32

33

34

35

36

37

38

39

40

41

42

43

44

45

46

47

48

49

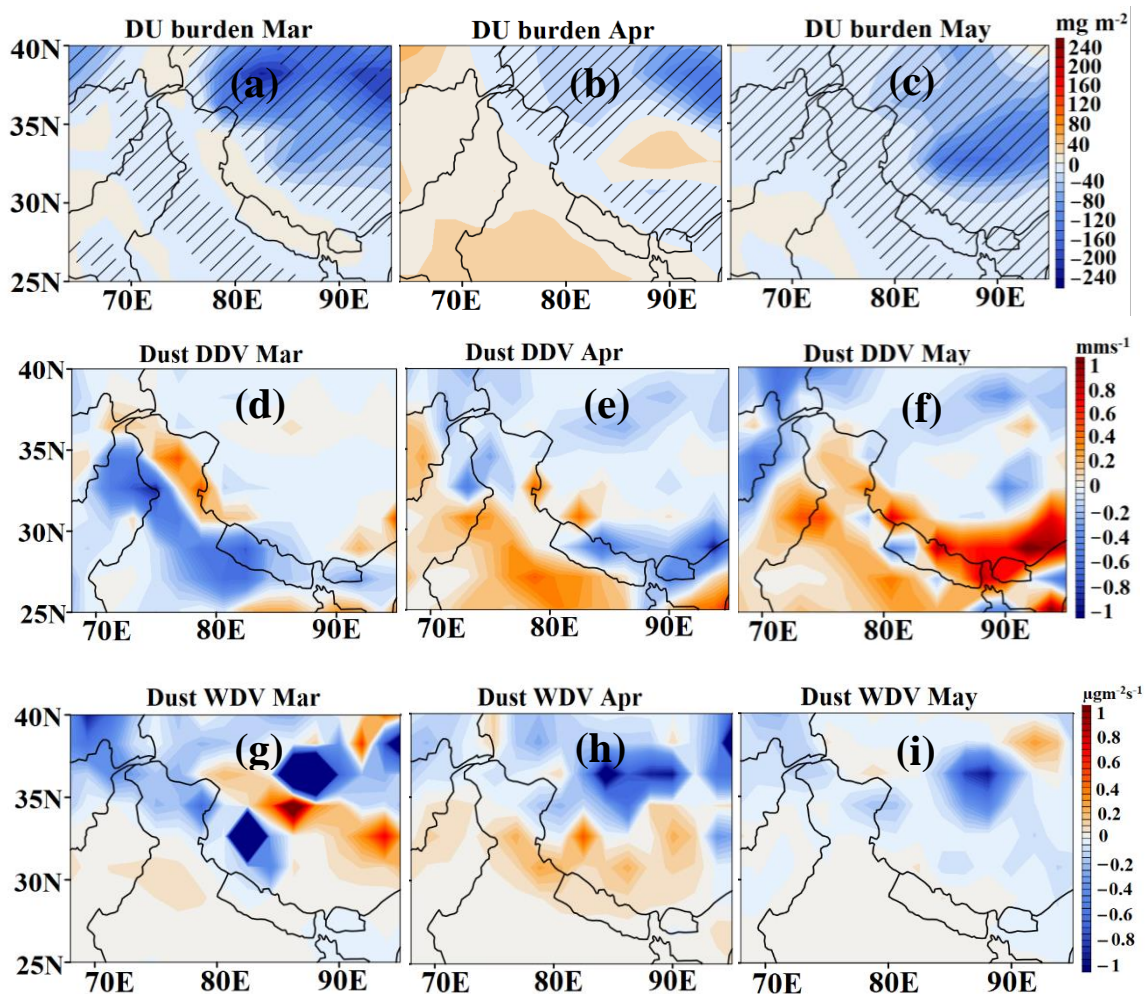

Figure S2: Spatial distribution of anomalies (COVID minus CTL) of atmospheric burden of simulated dust aerosols ( $\text{mg m}^{-2}$ ) (a) March, (b) April, (c) May 2020. Hatched area in Figures (a)-(c) indicate 95% significance level. Spatial distribution of anomalies (COVID minus CTL) of dust dry deposition velocity ( $\text{mm s}^{-1}$ ) (d) March, (e) April, (f) May 2020, (g-i) same as (d-f) but for wet deposition velocity ( $\mu\text{g m}^{-2} \text{s}^{-1}$ ).

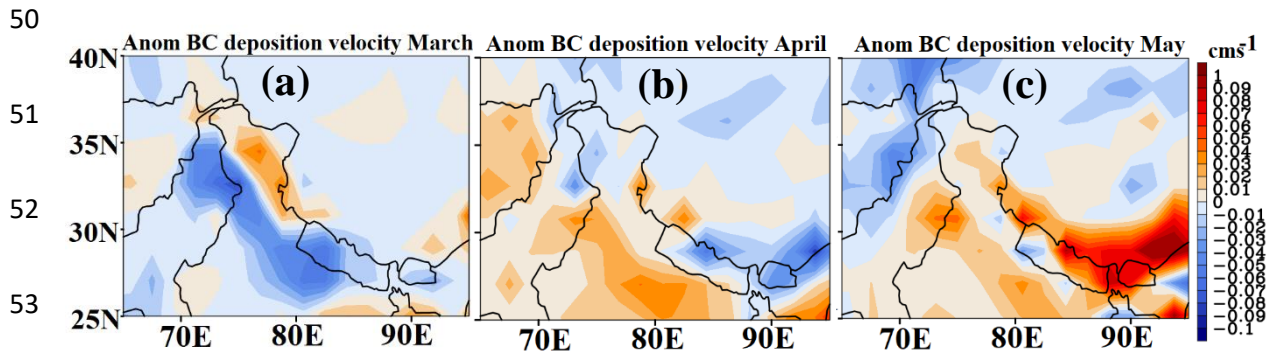

54 **Figure S3:** Anomalies (COVID minus CTL) of BC deposition velocity (dry + wet) ( $\text{cm}^{-1}$ ) for  
 55 (a) March, (b) April, (c) May 2020.

56

57

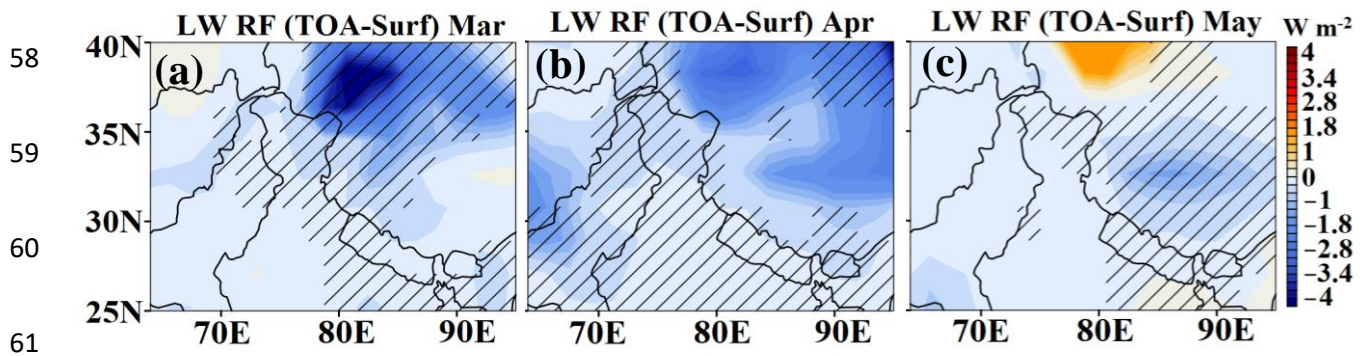

62 **Figure S4:** Anomalies (COVID minus CTL) of long wave radiative forcing in the atmosphere  
63 (top-of-atmosphere (TOA) minus surface) ( $Wm^{-2}$ ) for (a) March, (b) April, (c) May 2020.  
64 Hatched areas in Figures (a)-(c) indicate 95% significance level.

65

66

67

68

69

70

71

72

73

74

75

76

77

78  
79  
80  
81  
82  
83  
84  
85  
86  
87  
88  
89  
90  
91  
92  
93  
94  
95

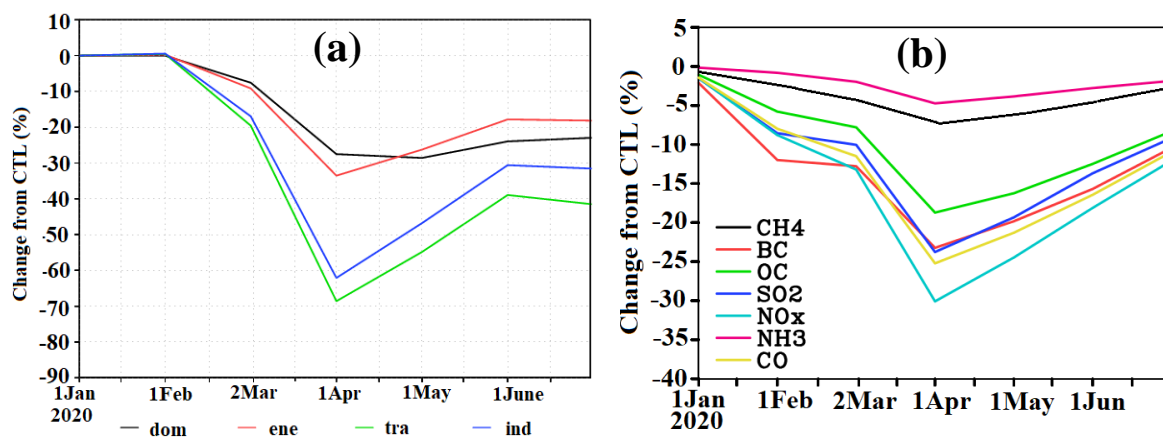

**Figure S5:** (a) Relative reduction of anthropogenic emissions (%) due to COVID-19 restrictions in India in the period 1 January to 1 July 2020 (COVID minus CTL). Emission sectors are color coded: residential and commercial emissions (dom, black), emissions related to energy production (ene, red), land transport related emissions (tra, green) and industrial emissions (ind, blue). The reduction is identical for all species, (b) globally averaged emission changes (%) for methane (CH<sub>4</sub>), carbon monoxide (CO), black carbon (BC), organic carbon (OC), sulfur dioxide (SO<sub>2</sub>), ammonia (NH<sub>3</sub>) nitrogen oxides (NO<sub>x</sub>) in the period January to 1 July 2020 (COVID minus CTL).

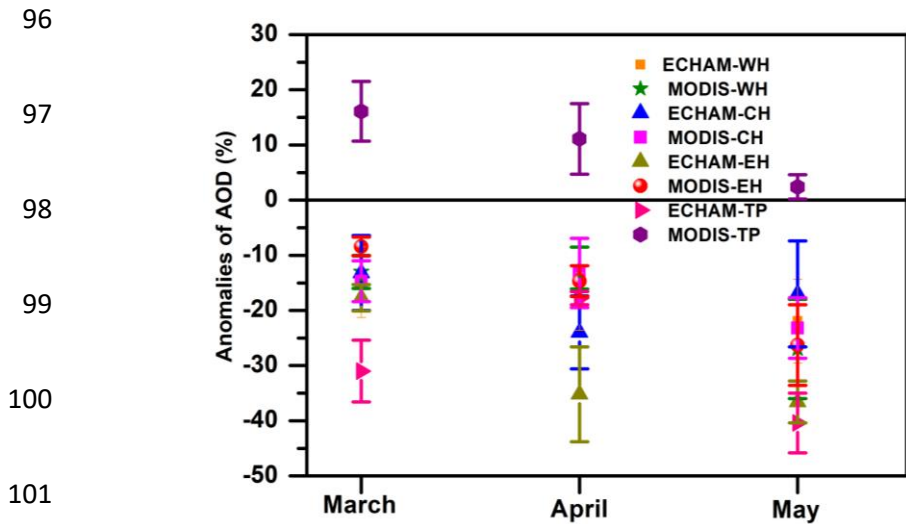

102 **Figure S6:** Anomalies (COVID minus CTL) of AOD (%) for March - May 2020 over the  
 103 Western Himalayas (WH), Central Himalayas (CH), Eastern Himalayas (EH), and Tibetan  
 104 Plateau (TP) regions from ECHAM-HAMMOZ (COVID minus CTL) and MODIS (year 2020  
 105 minus 2001-2019 mean).

106

107

108

109

110

111

112

113

114

115

116

117

118

119

120

121

122

123

124

125

126

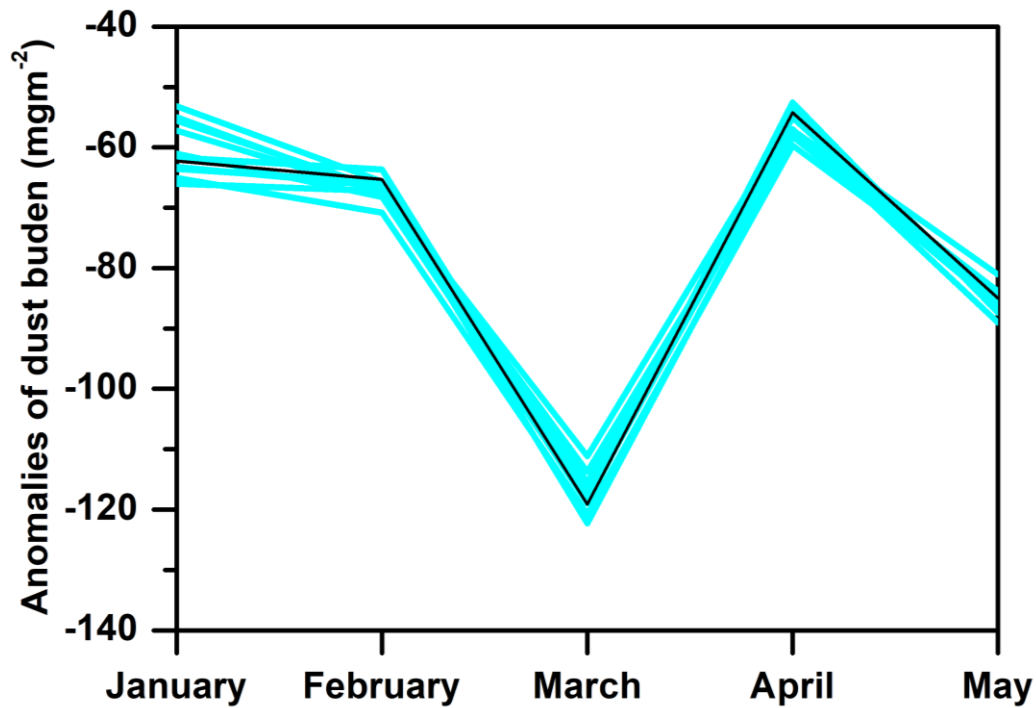

127 **Figure S7:** Anomalies of atmospheric burden of dust ( $\text{mg m}^{-2}$ ) at  $82^\circ \text{E}$ ,  $33^\circ \text{N}$  in the Tibetan

128 Plateau region (COVID minus CTL) as computed with ECHAM6-HAMMOZ. The black line

129 shows the average over the 10 members of the ECHAM6-HAMMOZ model simulation while

130 the cyan lines indicate the results of individual members, showing the spread within the

131 ECHAM6-HAMMOZ ensemble.

132
